# Supplementary material for: High Expression of FAM83B Predicts Poor Prognosis in Patients with Pancreatic Ductal Adenocarcinoma and Correlates with Cell Cycle and Cell Proliferation
Source: PubMed Central journal article supplement — J Cancer. 2017 Sep 12;8(16):3154–65. doi: 10.7150/jca.20086 (PMC5665031; doi:10.7150/jca.20086), 2017-09-12

### **Supplementary Figure Legends**

**Supplementary Figure 1: Down-regulation of FAM83B had no significant effect on PDAC cell invasion and apoptosis. A-B.** Transwell invasion assay of PANC-1 cells transfected with control-siRNA and FAM83B-siRNA was performed. Invasive cells were counted in four randomly selected high-power fields for three replicates. The results showed FAM83B down-regulation had no effect on the invasion ability of PDAC cells. **C-D.** The PDAC cell line PANC-1 was transfected with control-siRNA and FAM83B-siRNA. The results indicated that down-regulation of FAM83B made no significant difference to PDAC cell apoptosis. Error bars represented SEM.

**A** PANC-1

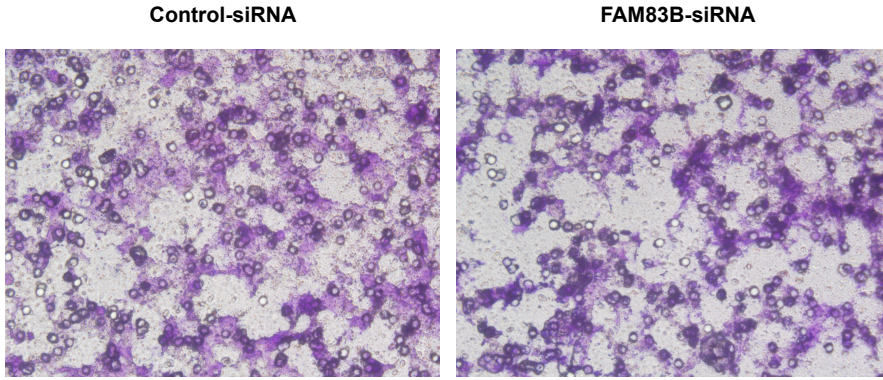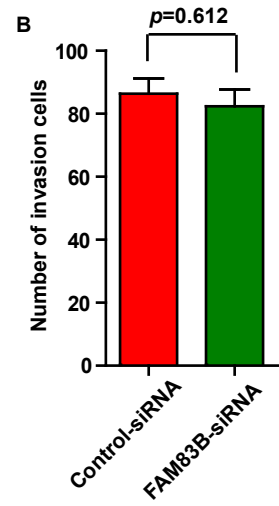

**C** PANC-1

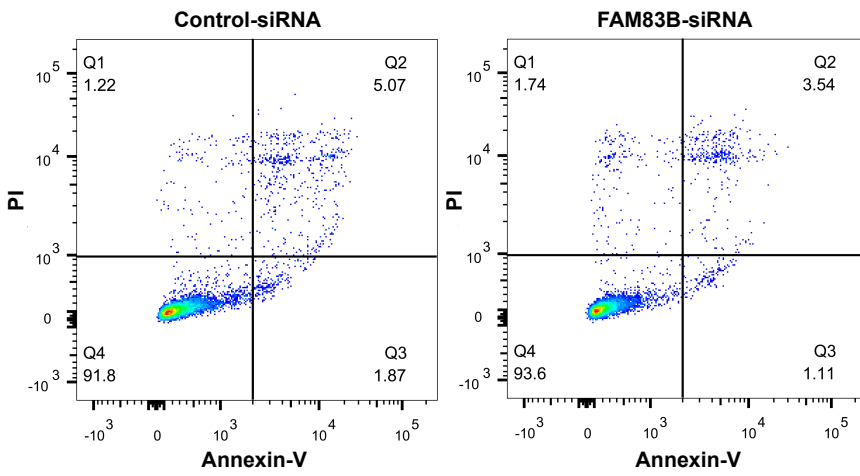

**D**

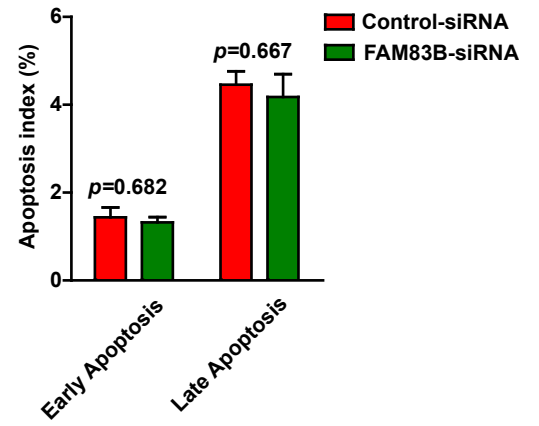

Supplement: jcav08p3154s1.pdf [file jcav08p3154s1.pdf]
